# Supplementary material
Source: publisher site journal article supplement (https://www.dovepress.com/article/553808)
Supplement: Supplementary file 1 [file 553808_Revised%20Supplements%20for%20corrections%20WL%20clean_1.docx]

**Supplements**

**Supplement 1: Institutional protocol for Y-90 radioembolization**

One to two weeks before treatment, all patients were assessed angiographically for vascular anatomy and with Tc-99m-macroaggregated albumin (MAA) SPECT/CT to estimate shunting to the lung and exclude microsphere deposition to the gastrointestinal tract. After local anesthesia with lidocaine 1%, a 5F vascular sheath was placed preferably in the right common femoral artery in Seldinger-technique via a 0.035-inch guide wire. An overview angiography of the celiac trunc and the superior mesentery artery was generated with a 5-F Cobra (Radifocus, Terumo Europe NV) or a 5-F SOS Omni Selective catheter (Soft-Vu, Angiodynamics). Afterwards, a microcatheter (Cantata 2.5 F or MicroFerret-18 3 F, Cook Medical) was advanced into the proper hepatic artery. Additional DSA runs allowed for analysis of hepatic artery anatomy, HCC tumour blushes and aberrant arterial blood supply. If necessary, coil-embolization of the gastroduodenal artery, the right gastric artery or any accessory artery was carried out to avoid later off-target embolization. After selective placement of a microcatheter in both the right and the left liver lobe, scintigraphy was performed with 120–200 MBq of technetium-99m-labelledmacroaggregated albumin (99mTc-MAA) to assess hepatopulmonary shunting. Y-90 radioembolization was considered feasible if there was no relevant abdominal off-target distribution of 99mTv-MAA and if later pulmonary radiation exposure due to hepatopulmonary shunting did not exceed 30 Gy. The radiation dose of Y90 was calculated based on the body surface area and the tumour burden of each lobe according to the equation below. If the hepatopulmonary shunt fraction of 99mTc-MAA was between 10 and 15% the total dose for Y-90 radioembolization was reduced by 20%, for a shunt fraction between 15 and 20% the dose could be reduced by up to 40%.

Therapy was performed in a separate session according to the angiographic standard protocol above by placement of a microcatheter in a lobar liver artery and application of the calculated dose. Depending on liver function, ECOG overall performance status, tumour burden and hepatopulmonary shunting the whole liver was treated in a single session or the right and left liver lobes were treated in a sequential fashion in accordance with the tumour board decision.

**Supplement 2: Patient characteristics before and after 2017**

| Demographics | | Total | Years  2008-2016 | Years  2017-2022 | Sign. |
| --- | --- | --- | --- | --- | --- |
| Number of patients (%) | | 92 | 53 | 39 |  |
| Mean age (years, SD) | | 65.3 (10.1) | 65.7 (9.1) | 64.9 (11.4) | 0.725 |
| Male sex | | 73 | 43 | 30 | 0.795 |
| Median survival (months, 95% CI)* | | 13 (10.5-15.5) | 11 (7.3-14.7) | 20.8 (10.5-15.5) | 0.024 |
| Liver Disease | | | | | |
| BCLC stage | B | 62 | 37 | 25 | 0.654 |
| C | 30 | 16 | 14 | 0.654 |
| Cirrhosis | | 67 | 37 | 30 | 0.486 |
| Hepatitis | | 36 | 21 | 15 | 1.000 |
| Portal vein thrombosis | | 28 | 15 | 13 | 0.651 |
| Previous treatments | | | | | |
| Resection | | 21 | 13 | 8 | 0.803 |
| TACE | | 29 | 16 | 13 | 0.822 |
| Ablation (brachytherapy, RFA, PEI) (%) | | 33 (36) | 14 (26) | 19 (49) | 0.047 |
| Targeted therapy | | 45 | 26 | 19 | 1.000 |
| Pre-interventional targeted therapy | | 21 | 13 | 8 | 0.803 |
| Specifics of TARE | | | | | |
| Median hepatopulmonary shunt, % (IQR) | | 6.4 (5.1) | 8.1 (4.8) | 4.2 (3.9) | <0.001 |
| Median tumour volumes, ml (IQR) | | 238 (371) | 192 (302) | 288 (478) | 0.348 |
| Median activity, mBq (IQR) | | 1.7 (0.6) | 1.7 (0.5) | 1.7 (0.7) | 0.470 |
| Dose reduction | | 23 | 12 | 11 | 0.629 |
| Lobar execution | | 52 | 30 | 22 | 1.000 |
| Tumour characterization at baseline (up to 3 lesions) | | | | | |
| TTV (in ml) | | 165 (306) | 177 (307) | 119 (313) | 0.054 |
| ETV (in ml) | | 69 (194) | 60 (154) | 81 (262) | 0.525 |
| ETV/TTV (in %) | | 71.5 | 48.0 | 87.1 | <0.001 |
| ETV/TTV > 50% (%) | | 56 | 22 (42) | 34 (87) | <0.001 |
| ETV reduction by 65% | | 18 | 11 | 7 | 0.796 |
| * Kaplan-Meier estimator  Abbreviations:  BCLC: Barcelona Clinic liver cancer stage (BCLC)  CI: confidence interval  ETV: enhancing tumour volume  IQR: interquartile range  mBq: megabecquerel  ml: milliliter  PEI: percutaneous ethanol Injection  RFA: radiofrequency ablation  SD: standard deviation  TACE: transarterial chemoembolization  TTV: total tumour volume | | |  |  |  |


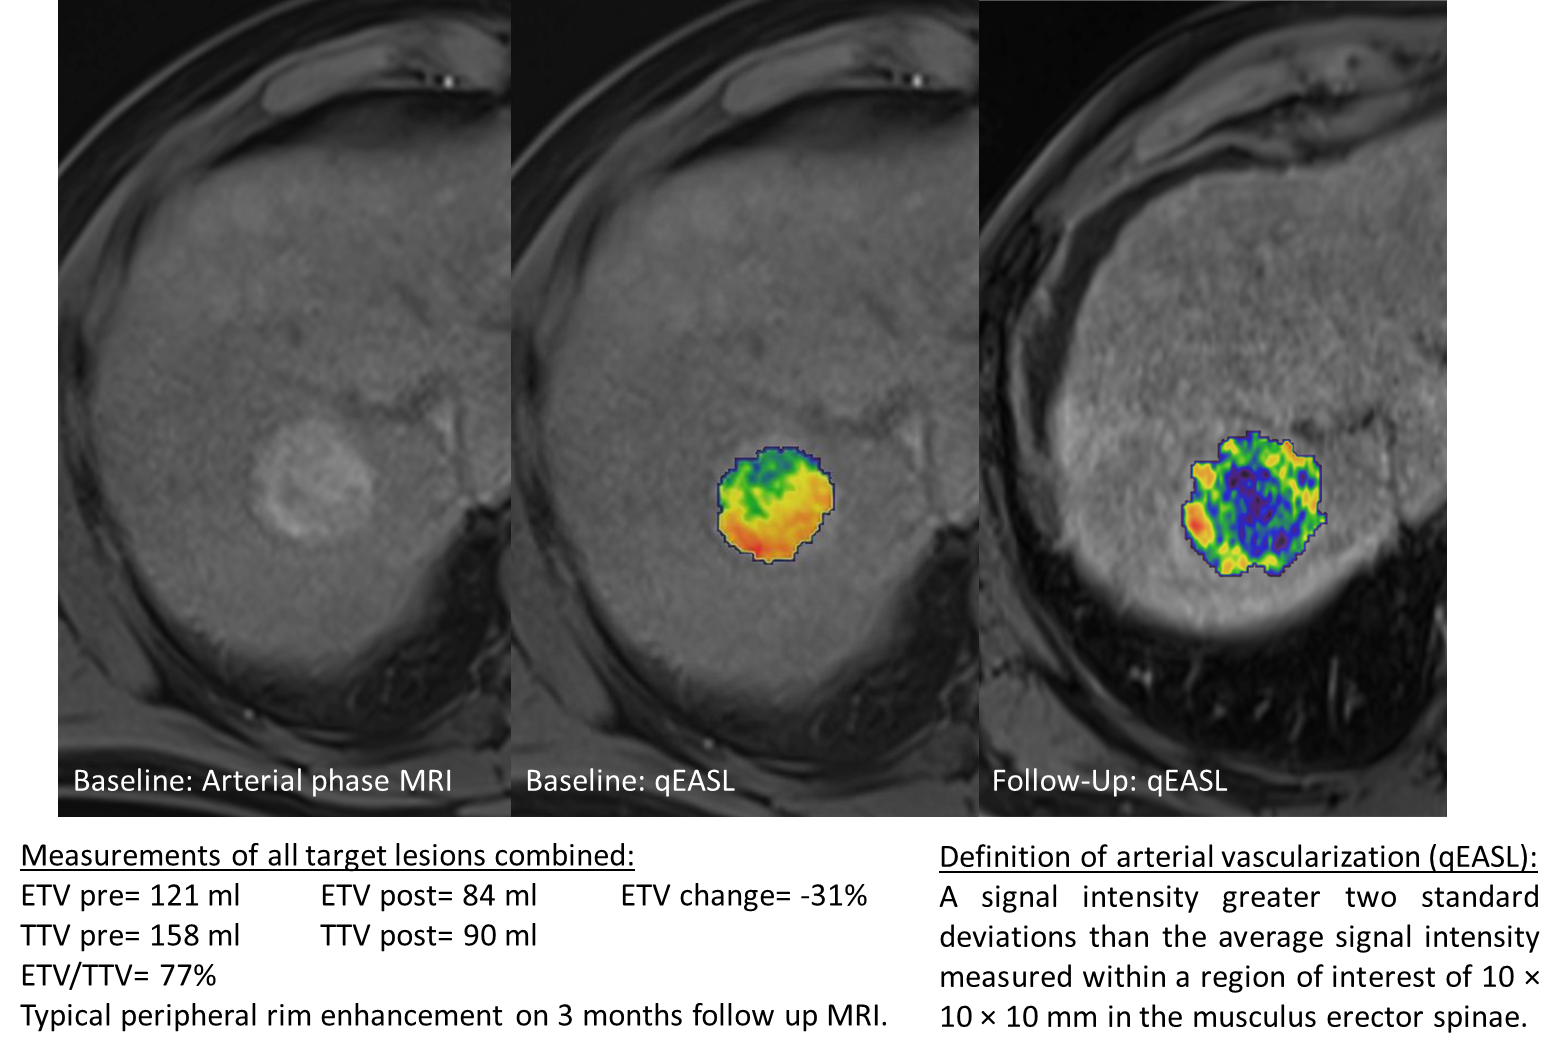
**Supplement 3: Example of baseline and follow-up segmentations Supplement 4: Predictors of time to progression of target lesions**

| Univariable analysis | All patients  n=92 | | Pre-interventional targeted therapy*  n=21 | | Other  n=71 | |
| --- | --- | --- | --- | --- | --- | --- |
| Targeted therapy † | HR  (95% CI) | Sign. | HR  (95% CI) | Sign. | HR  (95% CI) | Sign. |
| Before TARE (> 2months) | 1.12 | 0.818 |  |  |  |  |
| Pre-interventional (within 2 months) | 0.85 | 0.625 |  |  |  |  |
| After TARE | 0.51 | 0.059 |  |  |  |  |
| Demographics |  |  |  |  |  |  |
| Sex (male) | 1.18 | 0.681 | 0.65 | 0.499 | 1.63 | 0.361 |
| Age > 65 years | 1.42 | 0.269 | 1.35 | 0.646 | 1.45 | 0.303 |
| Liver disease |  |  |  |  |  |  |
| BCLC tumour stage C (versus B) | 1.08 | 0.822 | 1.18 | 0.799 | 1.00 | 0.988 |
| Portal vein thrombosis | 1.02 | 0.950 | 0.99 | 0.992 | 0.99 | 0.998 |
| Hepatitis | 1.10 | 0.769 | 1.60 | 0.475 | 0.98 | 0.948 |
| Cirrhosis | 1.18 | 0.642 | 1.72 | 0.436 | 0.97 | 0.936 |
|  | |  |  |  |  |  |
| Resection | 1.01 | 0.978 | 1.38 | 0.618 | 0.94 | 0.907 |
| TACE | 1.75 | 0.093 | 1.44 | 0.586 | 1.80 | 0.121 |
| Ablation | 1.60 | 0.138 | 1.32 | 0.664 | 1.67 | 0.162 |
| Radioembolization approach |  |  |  |  |  |  |
| Sequential lobar therapy | 1.16 | 0.649 | 0.61 | 0.440 | 1.42 | 0.346 |
| Dose reduction | 1.15 | 0.678 | 0.90 | 0.880 | 1.17 | 0.700 |
| Applied dose (GBq) | 0.63 | 0.237 | 0.13 | 0.052 | 0.82 | 0.651 |
| MRI tumour characterization |  |  |  |  |  |  |
| TTV (in ml) | 1.00 | 0.418 | 0.99 | 0.266 | 1.00 | 0.479 |
| ETV (in ml) | 0.99 | 0.169 | 0.99 | 0.119 | 0.99 | 0.235 |
| ETV/TTV | 0.23 | 0.002 | 0.21 | 0.170 | 0.26 | 0.010 |
| ETV/TTV > 50% | 0.40 | 0.004 | 0.26 | 0.092 | 0.46 | 0.031 |
| Hepatopulmonary shunt in % | 1.00 | 0.956 | 1.05 | 0.477 | 0.98 | 0.609 |
| * Pre-interventional: within 2 months before TARE  † Therapy with multikinase or immune checkpoint inhibition | | | | | | |
| Abbreviations:  BCLC: Barcelona Clinic Liver Cancer stage  CI: confidence interval  ETV: enhancing tumour volume  HR: hazard ratio  ml: milliliter | | Sign.: significance  TACE: transarterial chemoembolization  TKI: tyrosine kinase inhibitor  TTV: total tumour volume | | | | |

**Supplement 5: Univariable and multivariabel Cox regression analysis by timing of targeted therapy (95% Confidence Intervals included)**

| Univariable analysis | All patients  n=92 | | Pre-interventional targeted therapy*  n=21 | | Other  n=71 | |
| --- | --- | --- | --- | --- | --- | --- |
| Targeted therapy † | HR  (95% CI) | Sign. | HR  (95% CI) | Sign. | HR  (95% CI) | Sign. |
| Before TARE (> 2months) | 1.12  (0.43-2.94) | 0.82 |  |  |  |  |
| Pre-interventional (within 2 months) | 0.85  (0.72-1.32) | 0.63 |  |  |  |  |
| After TARE** | 0.73  (0.39-1.37) | 0.327 |  |  |  |  |
| Demographics |  |  |  |  |  |  |
| Sex (male) | 1.67  (0.87-3.2) | 0.125 | 2.54  (0.68-9.57) | 0.167 | 1.34  (0.73-2.46) | 0.457 |
| Age (years) | 0.99  (0.97-1.03) | 0.929 | 1.00  (0.92-1.09) | 0.933 | 1.00  (0.97-1.03) | 0.913 |
| Age > 65 years | 1.31  (0.78-2.20) | 0.302 | 1.01  (0.34-3.02) | 0.992 | 1.46  (0.81-2.65) | 0.208 |
| Liver disease |  |  |  |  |  |  |
| BCLC tumour stage C (versus B) | 1.35  (0.78-2.34) | 0.282 | 1.55  (0.51-4.66) | 0.440 | 1.31  (0.68-2.46) | 0.411 |
| Portal vein tumour thrombosis | 1.16  (0.66-2.04) | 0.609 | 0.83  (0.23-2.99) | 0.774 | 1.31  (0.69-2.45) | 0.411 |
| Tumor volume assessed for dosimetry | 1.00  (1.00-1.00) | 0.269 | 1.00  (0.99-1.00) | 0.196 | 1.00  (1.00-1.00) | 0.312 |
| ALBI Grade > 1 | 2.35  (1.38-4.00) | 0.002 | 4.65  (1.52-14.2) | 0.007 | 1.96  (1.07-3.58) | 0.030 |
| Hepatitis | 1.65  (0.98-2.76) | 0.059 | 2.63  (0.87-8.01) | 0.088 | 1.34  (0.73-2.46) | 0.339 |
| Cirrhosis | 1.58  (0.88-2.84) | 0.129 | 1.91  (0.62-5.89) | 0.353 | 1.42  (0.70-2.88) | 0.717 |
| Previous surgical or interventional treatments | |  |  |  |  |  |
| Resection | 0.82  (0.44-1.53) | 0.530 | 0.40  (0.12-1.31) | 0.130 | 1.27  (0.61-2.65) | 0.527 |
| TACE | 1.12  (0.65-1.94) | 0.679 | 3.11  (1.05-9.21) | 0.040 | 0.76  (0.39-1.47) | 0.407 |
| Ablation | 0.864  (0.50-1.48) | 0.593 | 1.26  (0.43-3.72) | 0.671 | 0.72  (0.38-1.35) | 0.301 |
| Radioembolization approach |  |  |  |  |  |  |
| Sequential lobar therapy | 0.87  (0.52-1.45) | 0.582 | 0.89  (0.31-2.54) | 0.824 | 0.85  (0.47-1.53) | 0.582 |
| Dose reduction | 1.00  (0.56-1.77) | 0.993 | 1.59  (0.53-4.82) | 0.411 | 0.79  (0.40-1.56) | 0.490 |
| Applied dose (GBq) | 0.96  (0.49-1.89) | 0.913 | 0.36  (0.05-2.79) | 0.330 | 1.13  (0.55-2.33) | 0.734 |
| Treatment after 2017 | 0.54  (0.31-0.94) | 0.028 | 0.56  (0.16-2.02) | 0.367 | 0.50  (0.27-0.93) | 0.028 |
| MRI tumour characterization |  |  |  |  |  |  |
| TTV (in ml) | 1.00  (0.99-1.00) | 0.909 | 1.00  (0.99-1.00) | 0.570 | 1.00  (0.99-1.00) | 0.884 |
| ETV (in ml) | 1.00  (0.99-1.00) | 0.792 | 1.00  (0.99-1.00) | 0.565 | 1.00  (0.99-1.00) | 0.726 |
| ETV/TTV | 0.60  (0.27-1.36) | 0.222 | 0.12  (0.02-0.85) | 0.034 | 0.95  (0.38-2.41) | 0.915 |
| ETV/TTV > 50% | 0.67  (0.40-1.13) | 0.131 | 0.31  (0.10-0.94) | 0.039 | 0.91  (0.49-1.68) | 0.755 |
| Hepatopulmonary shunt in % | 1.02  (0.97-1.07) | 0.482 | 1.04  (0.93-1.16) | 0.467 | 1.02  (0.96-1.08) | 0.608 |
| MRI response assessment |  |  |  |  |  |  |
| Reduction in ETV by 65% | 0.64  (0.31-1.30) | 0.219 | 0.20  (0.04-0.91) | 0.038 | 1.18  (0.53-2.64) | 0.692 |
| * Pre-interventional: within 2 months before TARE  † Therapy with multikinase or immune checkpoint inhibition  ** Time-dependent Cox regression was used to avoid immortal time bias | | | | | | |
| Abbreviations:  BCLC: Barcelona Clinic Liver Cancer stage  CI: confidence interval  ETV: enhancing tumour volume  HR: hazard ratio  ml: milliliter | | Sign.: significance  TACE: transarterial chemoembolization  TKI: tyrosine kinase inhibitor  TTV: total tumour volume | | | | |

| Multivariable analysis | All patients  n=92 | | Pre-interventional targeted therapy*  n=21 | | Other  n=71 | |
| --- | --- | --- | --- | --- | --- | --- |
| Demographics | HR  (95% CI) | Sign. | HR  (95% CI) | Sign. | HR  (95% CI) | Sign. |
| Age (years) | 0.99  (0.96-1.02) | 0.486 | 0.81  (0.69-0.94) | 0.008 | 1.00  (0.96-1.03) | 0.879 |
| Liver disease |  |  |  |  |  |  |
| BCLC tumour stage C (versus B) | 1.12  (0.59-2.15) | 0.725 | 0.04  (0.01-0.66) | 0.024 | 1.41  (0.63-3.18) | 0.405 |
| Tumor volume assessed for dosimetry | 1.00  (1.00-1.00) | 0.620 | 1.01  (1.00-1.02) | 0.022 | 1.00  (0.99-1.00) | 0.886 |
| ALBI Grade > 1 | 2.55  (1.42-4.57) | 0.002 | 10.17  (0.74-140) | 0.083 | 2.18  (1.15-4.14) | 0.017 |
| Radioembolization approach |  |  |  |  |  |  |
| Treatment after 2017 | 0.51  (0.26-1.01) | 0.052 | 0.20  (0.02-2.29) | 0.198 | 0.31  (0.14-0.71) | 0.005 |
| MRI tumour characterization |  |  |  |  |  |  |
| ETV/TTV > 50% | 1.02  (0.54-1.96) | 0.942 | 0.046  (0.01-0.82) | 0.036 | 1.64  (0.76-3.53) | 0.206 |
| * Pre-interventional: within 2 months before TARE  † Therapy with multikinase or immune checkpoint inhibition  ** Time-dependent Cox regression was used to avoid immortal time bias | | | | | | |
| Abbreviations:  ALBI Grade: Albumin-Bilirubin Grade  BCLC: Barcelona Clinic Liver Cancer stage  ETV: enhancing tumour volume  HR: hazard ratio  ml: milliliter | | Sign.: significance  TACE: transarterial chemoembolization  TKI: tyrosine kinase inhibitor  TTV: total tumour volume | | | | |

**
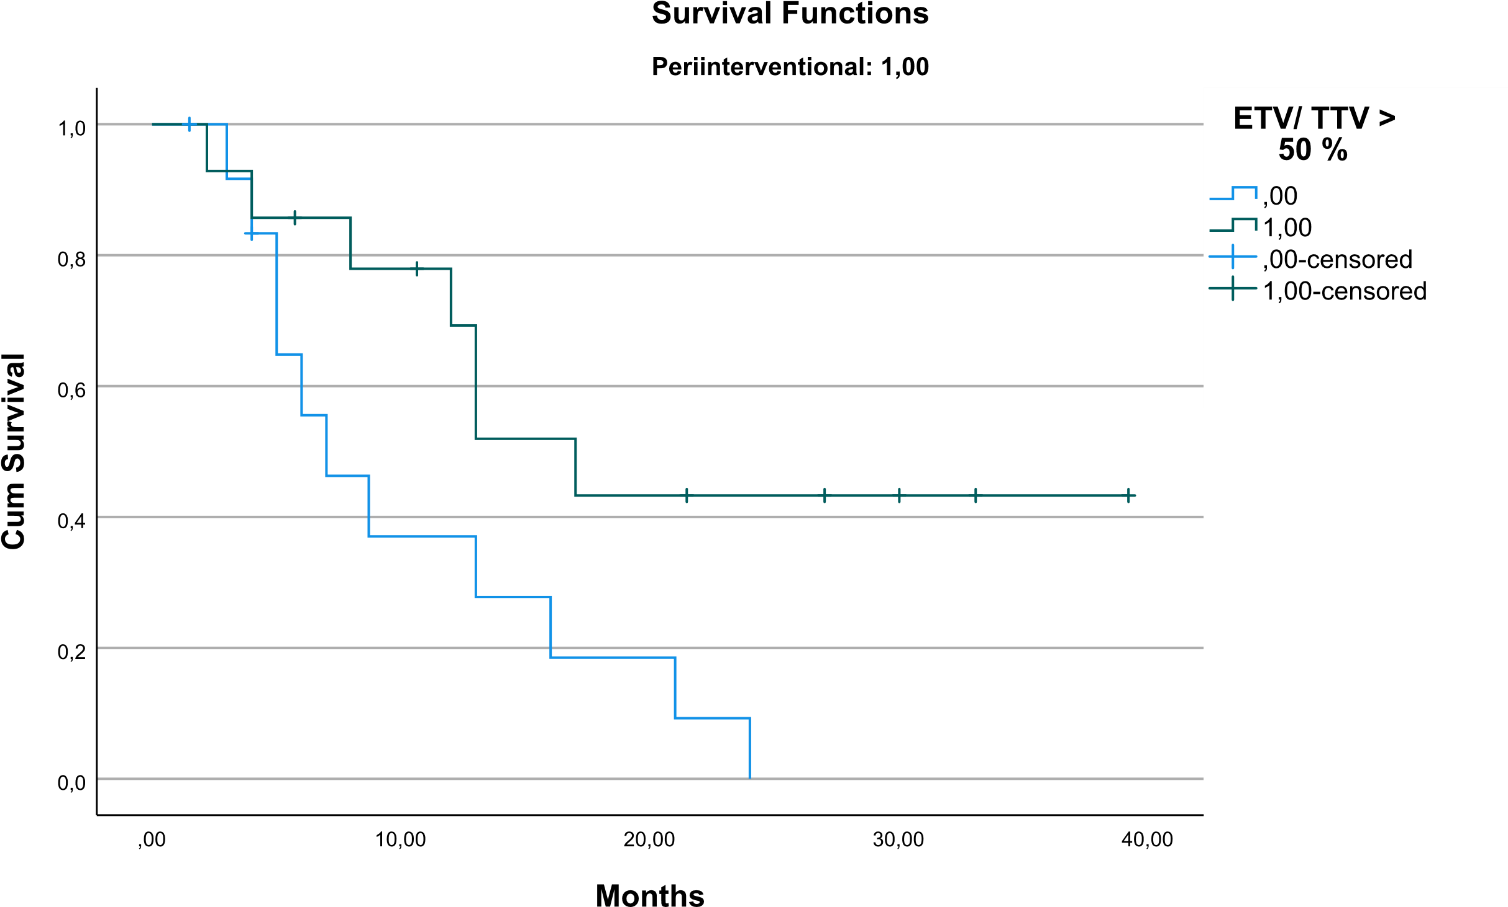

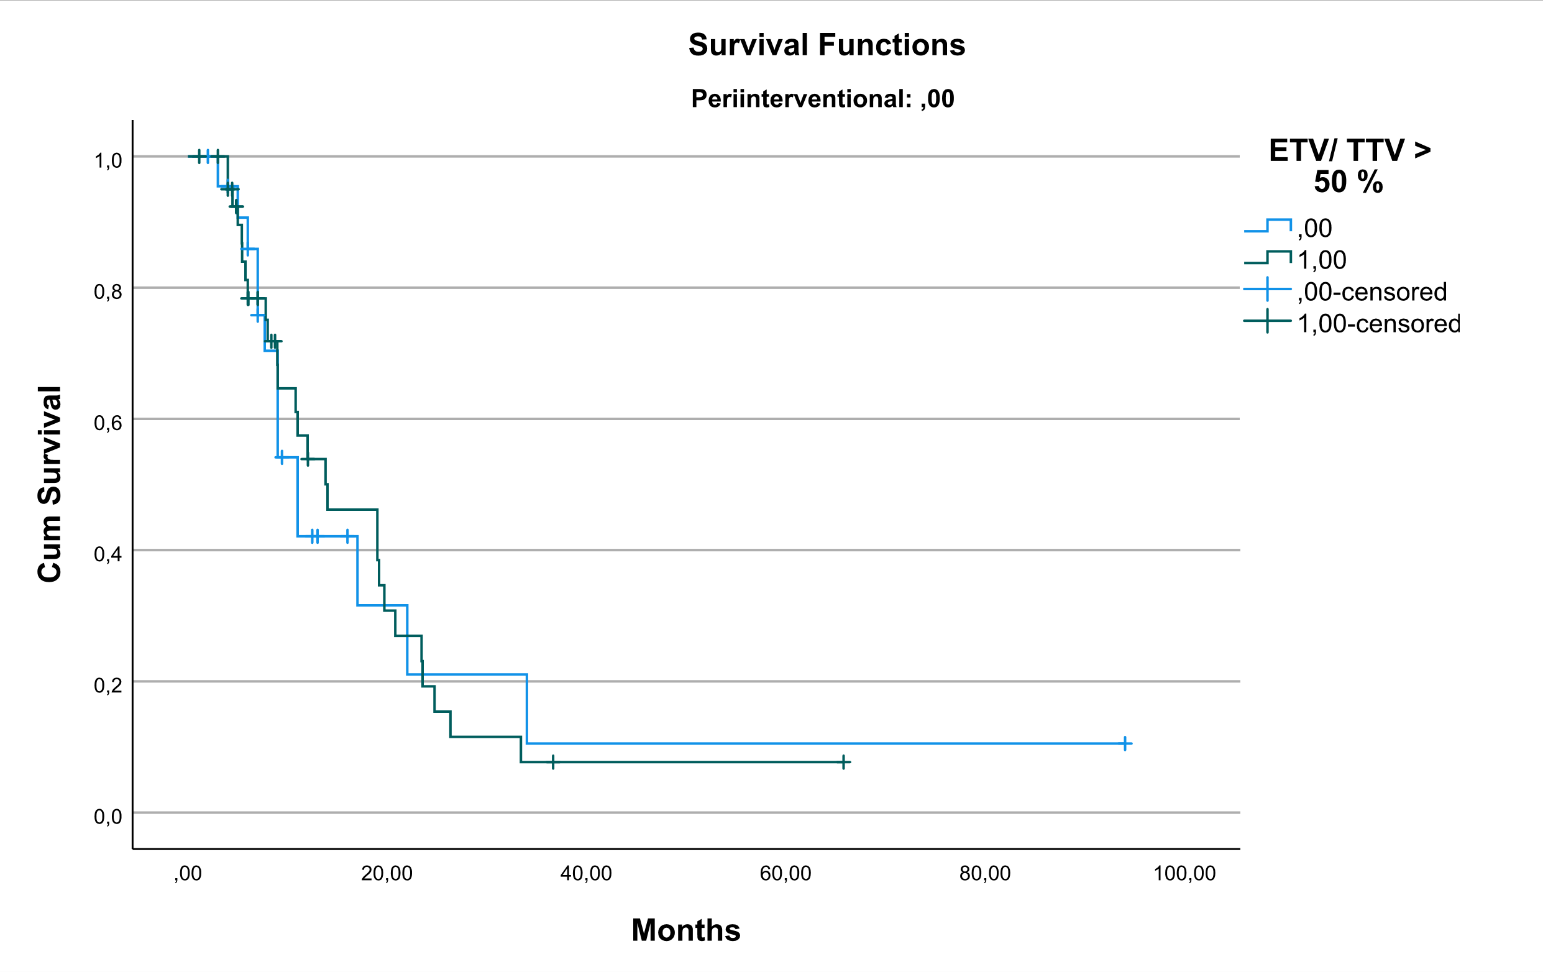
Supplement 6: Impact of baseline vascularity in patients with or without peri-interventional (pre and post) targeted therapy**
